# Supplementary material for: Neuer deutschsprachiger Fragebogen zur standardisierten Erfassung von Muskel-Skelett-Beschwerden im Betrieb
Source: Springer Nature journal article supplement (doi:10.1007/s40664-023-00516-x), 2023-09-07
Supplement: MOESM1 [file 26015870]

baa:

## Fragebögen

Bitte die folgenden Seiten ausfüllen und zurücksenden.

---

Probanden-ID: \_\_\_\_\_

(Wird vom Studienpersonal ausgefüllt)



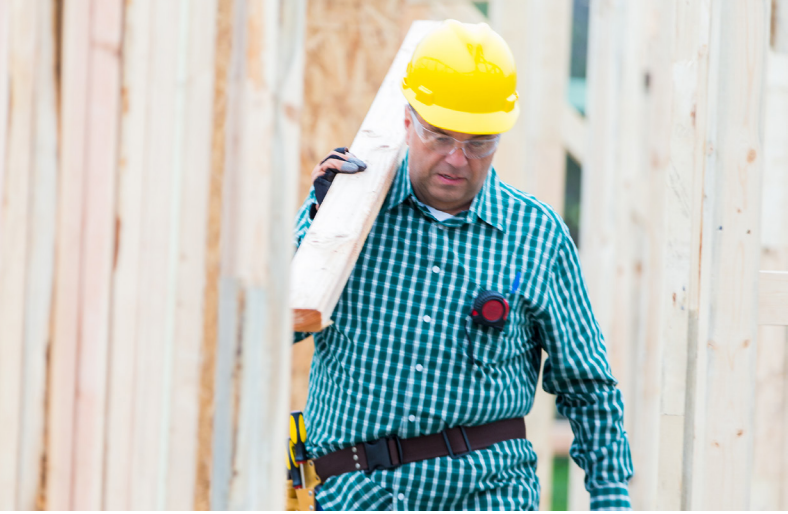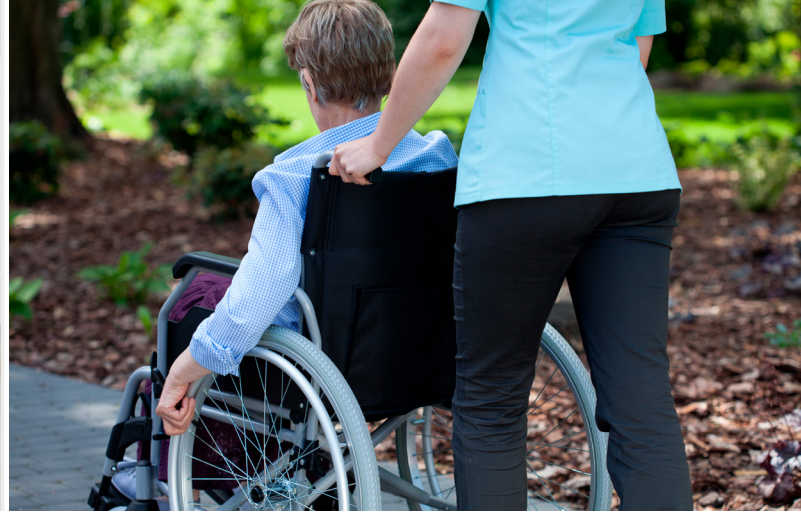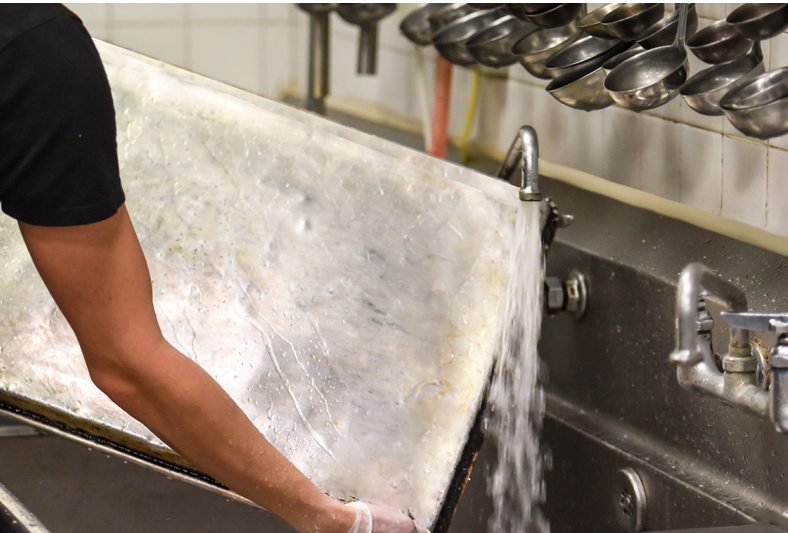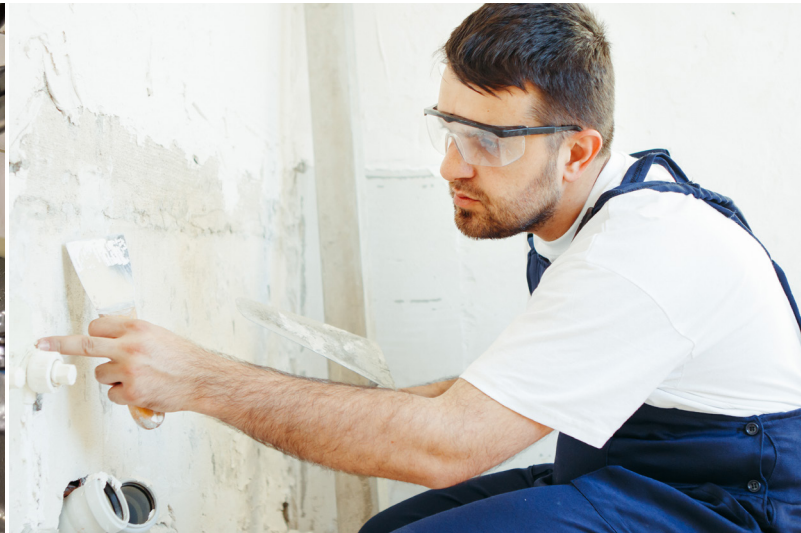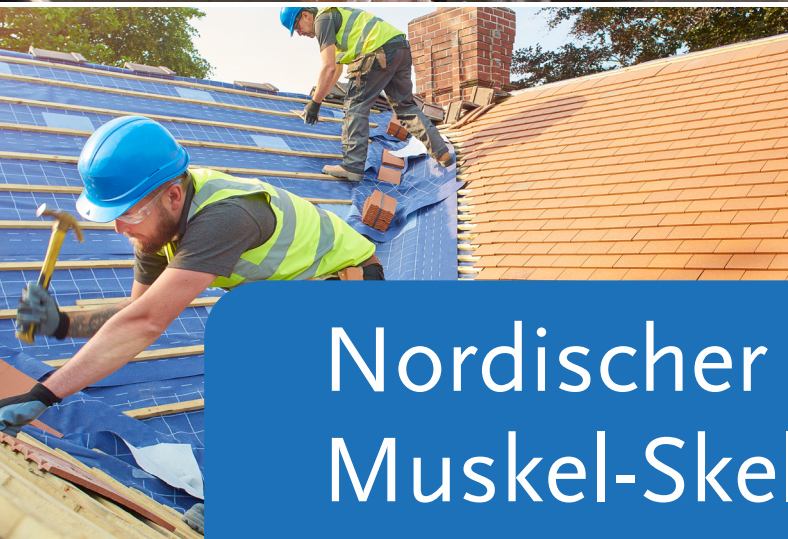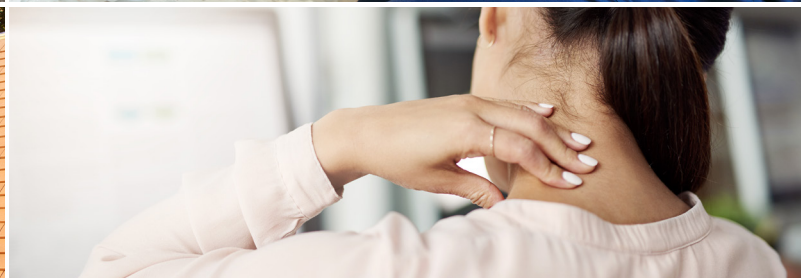

# Nordischer Fragebogen zu Muskel-Skelett-Beschwerden (NFB\*MSB)

baua: Praxis

# Inhalt

|       |                                        |    |
|-------|----------------------------------------|----|
|       | Einleitung                             | 3  |
|       | Hinweise zum Ausfüllen des Fragebogens | 4  |
| <hr/> |                                        |    |
| 1     | Nacken & Halswirbelsäule               | 5  |
| 2     | Schultergelenke & Oberarme             | 6  |
| 3     | Ellenbogen & Unterarm                  | 7  |
| 4     | Hand & Handgelenk                      | 8  |
| 5     | Brustwirbelsäule                       | 9  |
| 6     | Lendenwirbelsäule & unterer Rücken     | 10 |
| 7     | Hüftgelenke & Oberschenkel             | 11 |
| 8     | Kniegelenke                            | 12 |
| 9     | Unterschenkel                          | 13 |
| 10    | Fuß & Fußgelenk                        | 14 |
| <hr/> |                                        |    |
|       | Allgemeine Fragen                      | 15 |
| <hr/> |                                        |    |
|       | Impressum                              | 20 |

# Einleitung

Beschwerden des Bewegungsapparats, z. B. Rückenschmerzen, werden von Beschäftigten häufig berichtet. Aussagen zur Lokalisation, Art und Intensität der Beschwerden bei Beschäftigten sind im betriebliche Kontext wichtig, um Präventionsschwerpunkte ableiten und Maßnahmen evaluieren zu können.

Für die systematische Erfassung der Beschwerden werden vorrangig Fragebögen eingesetzt. Derzeit wird oft auf Modifikationen des Nordischen Fragebogens zu Muskel-Skelett-Beschwerden (NMQ) von Kuorinka et al., 1987, zurückgegriffen (z. B. in der arbeitsmedizinischen Vorsorge, Mitarbeiterbefragungen oder in betrieblichen Studien). Es besteht daher Bedarf an einer aktualisierten Version.

Basierend auf einer Analyse des Ist-Zustandes, wie der NMQ in internationalen Studien derzeit verwendet wird, wurden Anforderungen für eine aktualisierte deutschsprachige Version des NMQ abgeleitet. Die vorliegende überarbeitete Version des Nordischen Fragebogens zu Muskel-Skelett-Beschwerden (NFB\*MSB) wurde von der BAuA in Kooperation mit der BGW entwickelt.

Der aktualisierte Fragebogen ist kurz, verständlich, praxisnah, modular, einheitlich aufgebaut und umfasst alle Gelenkregionen. Mit dem NFB\*MSB wird ermittelt, wo und wie häufig Muskel-Skelett-Beschwerden vorkommen und ob diese die Aktivitäten in Beruf oder Freizeit einschränken.

Der Fragebogen wird derzeit weiter validiert. Es wird dazu aufgerufen, ihn breit zu nutzen. Mit Ihren Rückmeldungen unterstützen Sie die Validierung.

Den Fragebogen können Sie im Internet herunterladen unter:

[www.baua.de/dok/8839992](http://www.baua.de/dok/8839992).



# Hinweise zum Ausfüllen des Fragebogens

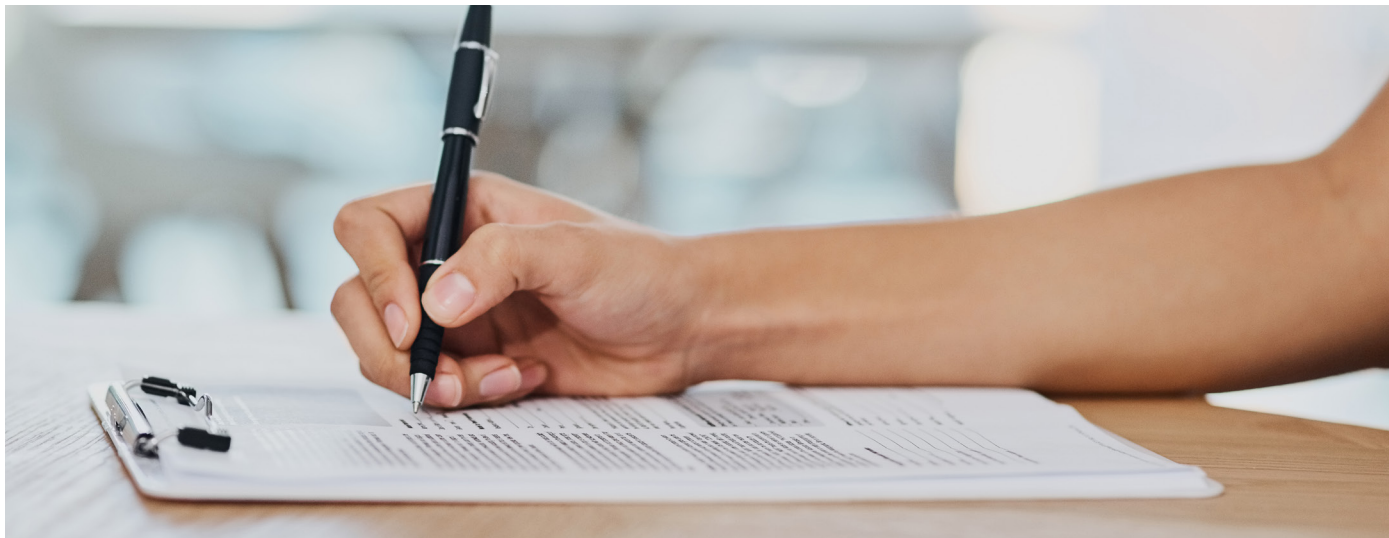

Dies ist ein Fragebogen zu Muskel-Skelett-Beschwerden in zehn verschiedenen Körperregionen. In den folgenden Fragen geben Sie bitte an, ob Sie in den einzelnen Körperregionen schon einmal Beschwerden hatten. Wo genau die jeweiligen Körperregionen lokalisiert sind, wird in den Abbildungen auf den folgenden Seiten dargestellt.

Unter Beschwerden werden in diesem Fragebogen Stechen, Schmerzen und Missempfindungen in der jeweiligen Körperregion verstanden. Die Beschwerden können sowohl punktförmig als auch flächig sein. Bitte berücksichtigen Sie auch Beschwerden, wenn diese in eine andere Körperregion ausstrahlen (z. B. ein Ischias-Schmerz).

Bitte beantworten Sie die Fragen zu jeder Körperregion und kreuzen Sie in jeder Frage nur eine Antwortmöglichkeit an.

**Falls Sie ein falsch gesetztes Kreuz ändern möchten, streichen Sie bitte Ihre Antwort deutlich durch und setzen Sie das Kreuz an der gewünschten Stelle neu.**

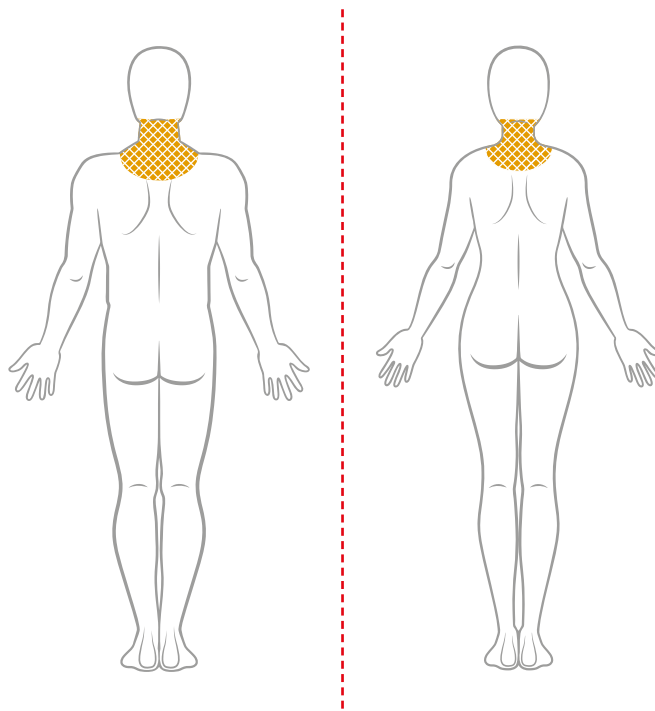

# 1 Nacken & Halswirbelsäule

1a. Hatten Sie während der letzten 12 Monate Beschwerden in der Nackenregion und/oder Halswirbelsäule? Wenn ja, bitte addieren Sie alle Tage mit Beschwerden.

- Nein
- Ja, an 1-7 Tagen
- Ja, an 8-30 Tagen
- Ja, an mehr als 30 Tagen, aber nicht jeden Tag
- Ja, (fast) jeden Tag

**Wenn Sie keine Beschwerden in der Nackenregion und/oder Halswirbelsäule hatten, gehen Sie bitte zur Körperregion auf der nächsten Seite.**

1b. Haben diese Beschwerden Sie in den letzten 12 Monaten bei Ihren beruflichen Tätigkeiten oder in Ihrer Freizeit eingeschränkt?

- Nein  Ja

1c. Hatten Sie diese Beschwerden auch irgendwann in den letzten 4 Wochen?

- Nein  Ja

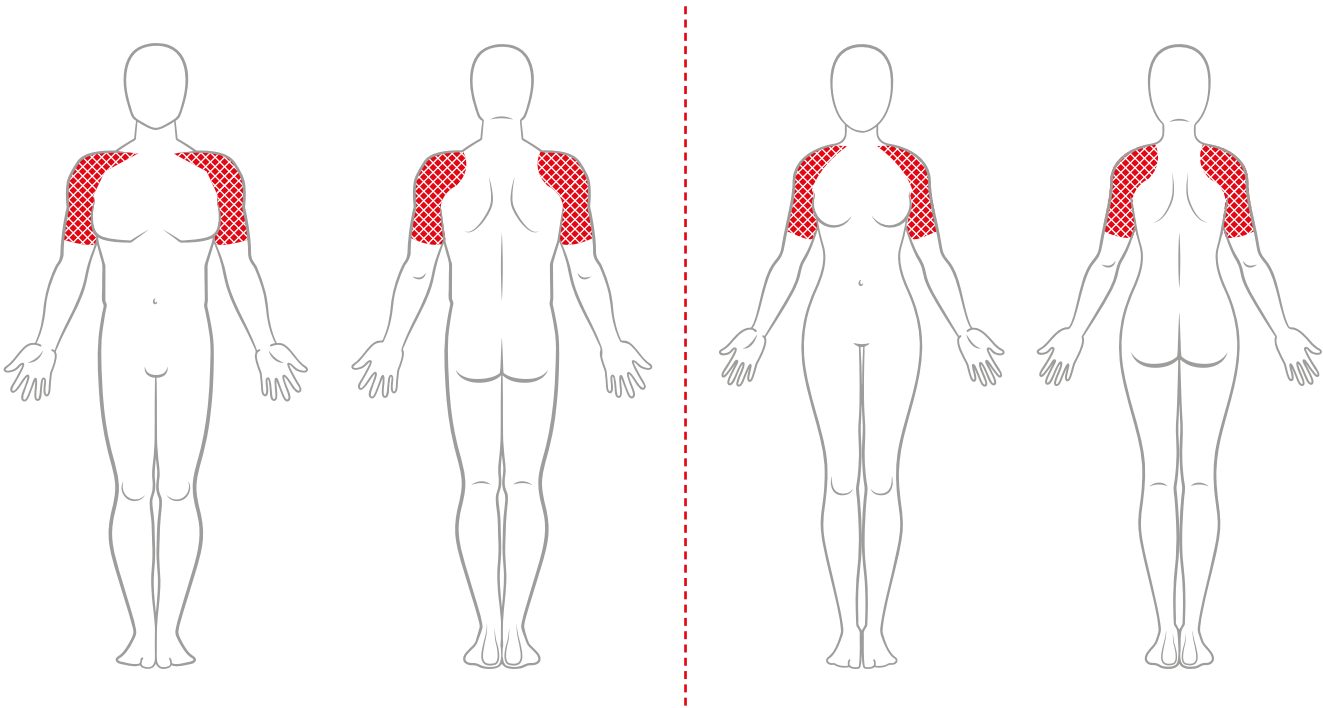

## 2 Schultergelenke & Oberarme

2a. Hatten Sie während der letzten 12 Monate Beschwerden in den Schultergelenken und/oder Oberarmen? Wenn ja, bitte addieren Sie alle Tage mit Beschwerden.

- Nein
  Ja, an 1-7 Tagen  
 Ja, an 8-30 Tagen  
 Ja, an mehr als 30 Tagen, aber nicht jeden Tag  
 Ja, (fast) jeden Tag

**Wenn Sie keine Beschwerden in den Schultergelenken und/oder Oberarmen hatten, gehen Sie bitte zur Körperregion auf der nächsten Seite.**

2b. Haben diese Beschwerden Sie in den letzten 12 Monaten bei Ihren beruflichen Tätigkeiten oder in Ihrer Freizeit eingeschränkt?

- Nein
  Ja

2c. Hatten Sie diese Beschwerden auch irgendwann in den letzten 4 Wochen?

- Nein
  Ja



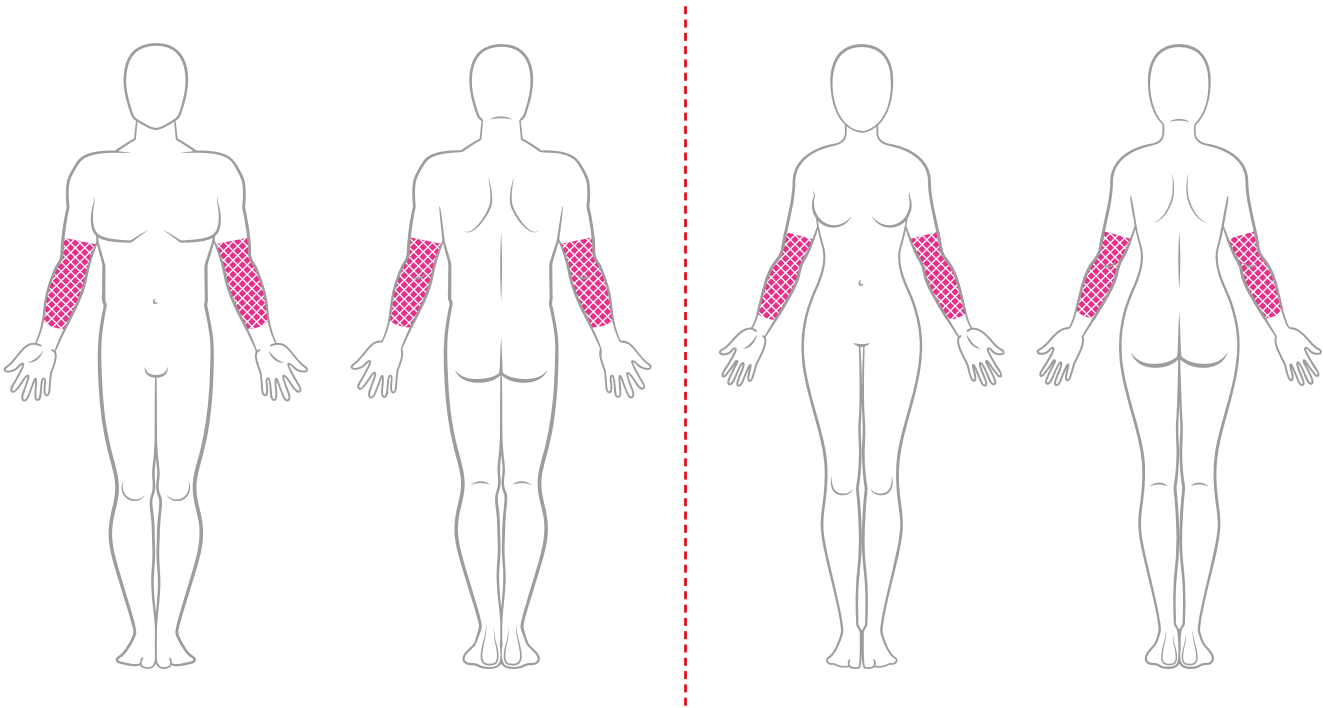

### 3 Ellenbogen & Unterarm

3a. Hatten Sie während der letzten 12 Monate Beschwerden in den Ellenbogen und/oder Unterarmen? Wenn ja, bitte addieren Sie alle Tage mit Beschwerden.

- |                               |                                                                         |
|-------------------------------|-------------------------------------------------------------------------|
| <input type="checkbox"/> Nein | <input type="checkbox"/> Ja, an 1-7 Tagen                               |
|                               | <input type="checkbox"/> Ja, an 8-30 Tagen                              |
|                               | <input type="checkbox"/> Ja, an mehr als 30 Tagen, aber nicht jeden Tag |
|                               | <input type="checkbox"/> Ja, (fast) jeden Tag                           |

**Wenn Sie keine Beschwerden in den Ellenbogen und/oder Unterarmen hatten, gehen Sie bitte zur Körperregion auf der nächsten Seite.**

3b. Haben diese Beschwerden Sie in den letzten 12 Monaten bei Ihren beruflichen Tätigkeiten oder in Ihrer Freizeit eingeschränkt?

- |                               |                             |
|-------------------------------|-----------------------------|
| <input type="checkbox"/> Nein | <input type="checkbox"/> Ja |
|-------------------------------|-----------------------------|

3c. Hatten Sie diese Beschwerden auch irgendwann in den letzten 4 Wochen?

- |                               |                             |
|-------------------------------|-----------------------------|
| <input type="checkbox"/> Nein | <input type="checkbox"/> Ja |
|-------------------------------|-----------------------------|

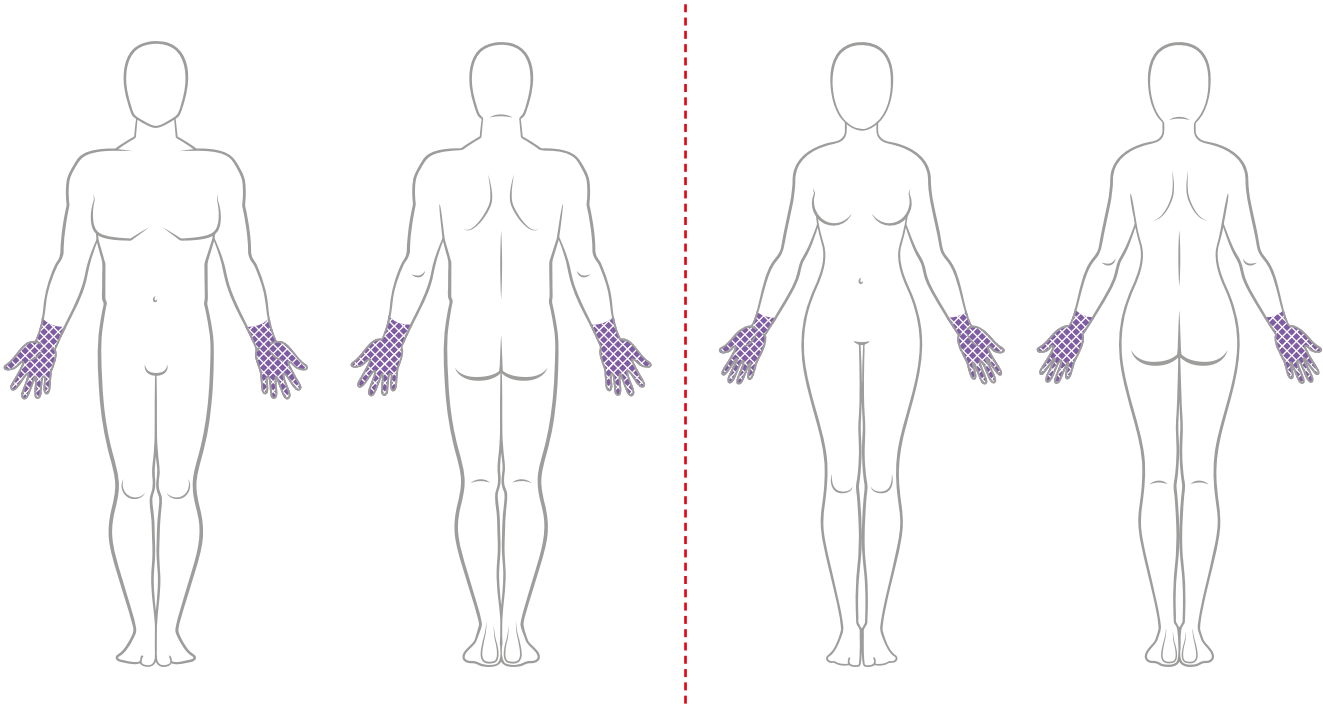

## 4 Hand & Handgelenk

4a. Hatten Sie während der letzten 12 Monate Beschwerden in den Händen und/oder Handgelenken? Wenn ja, bitte addieren Sie alle Tage mit Beschwerden.

- Nein
  Ja, an 1-7 Tagen  
 Ja, an 8-30 Tagen  
 Ja, an mehr als 30 Tagen, aber nicht jeden Tag  
 Ja, (fast) jeden Tag

**Wenn Sie keine Beschwerden in den Händen und/oder Handgelenken hatten, gehen Sie bitte zur Körperregion auf der nächsten Seite.**

4b. Haben diese Beschwerden Sie in den letzten 12 Monaten bei Ihren beruflichen Tätigkeiten oder in Ihrer Freizeit eingeschränkt?

- Nein
  Ja

4c. Hatten Sie diese Beschwerden auch irgendwann in den letzten 4 Wochen?

- Nein
  Ja

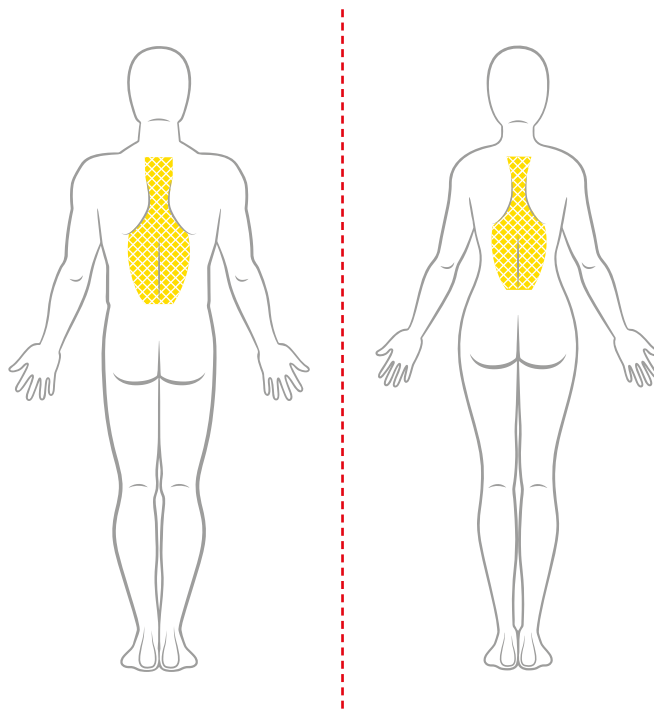

## 5 Brustwirbelsäule

5a. Hatten Sie während der letzten 12 Monate Beschwerden in der Brustwirbelsäule?  
Wenn ja, bitte addieren Sie alle Tage mit Beschwerden.

- |                               |                                                                         |
|-------------------------------|-------------------------------------------------------------------------|
| <input type="checkbox"/> Nein | <input type="checkbox"/> Ja, an 1-7 Tagen                               |
|                               | <input type="checkbox"/> Ja, an 8-30 Tagen                              |
|                               | <input type="checkbox"/> Ja, an mehr als 30 Tagen, aber nicht jeden Tag |
|                               | <input type="checkbox"/> Ja, (fast) jeden Tag                           |

**Wenn Sie keine Beschwerden in der Brustwirbelsäule hatten, gehen Sie bitte zur Körperregion auf der nächsten Seite.**

5b. Haben diese Beschwerden Sie in den letzten 12 Monaten bei Ihren beruflichen Tätigkeiten oder in Ihrer Freizeit eingeschränkt?

- |                               |                             |
|-------------------------------|-----------------------------|
| <input type="checkbox"/> Nein | <input type="checkbox"/> Ja |
|-------------------------------|-----------------------------|

5c. Hatten Sie diese Beschwerden auch irgendwann in den letzten 4 Wochen?

- |                               |                             |
|-------------------------------|-----------------------------|
| <input type="checkbox"/> Nein | <input type="checkbox"/> Ja |
|-------------------------------|-----------------------------|

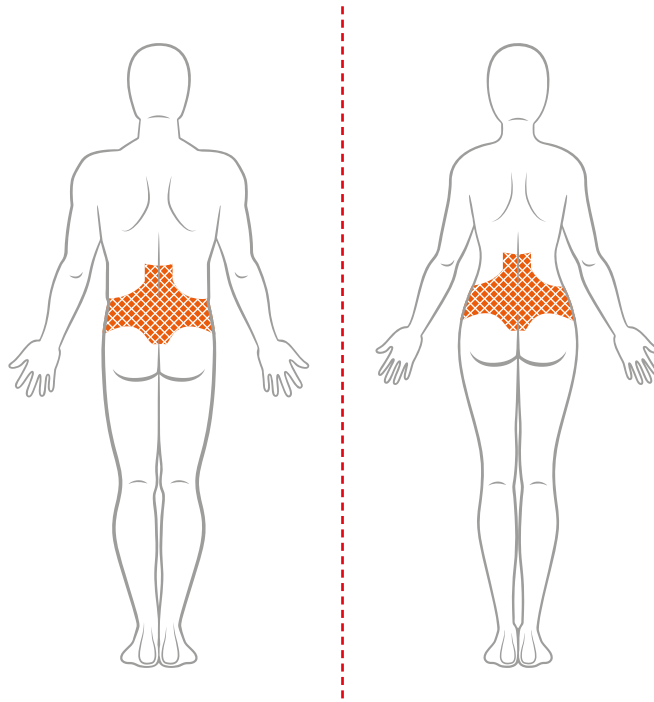

## 6 Lendenwirbelsäule & unterer Rücken

6a. Hatten Sie während der letzten 12 Monate Beschwerden in der Lendenwirbelsäule und/oder im unteren Rücken? Wenn ja, bitte addieren Sie alle Tage mit Beschwerden.

- Nein
  Ja, an 1-7 Tagen  
 Ja, an 8-30 Tagen  
 Ja, an mehr als 30 Tagen, aber nicht jeden Tag  
 Ja, (fast) jeden Tag

**Wenn Sie keine Beschwerden in der Lendenwirbelsäule und/oder im unteren Rücken hatten, gehen Sie bitte zur Körperregion auf der nächsten Seite.**

6b. Haben diese Beschwerden Sie in den letzten 12 Monaten bei Ihren beruflichen Tätigkeiten oder in Ihrer Freizeit eingeschränkt?

- Nein
  Ja

6c. Hatten Sie diese Beschwerden auch irgendwann in den letzten 4 Wochen?

- Nein
  Ja

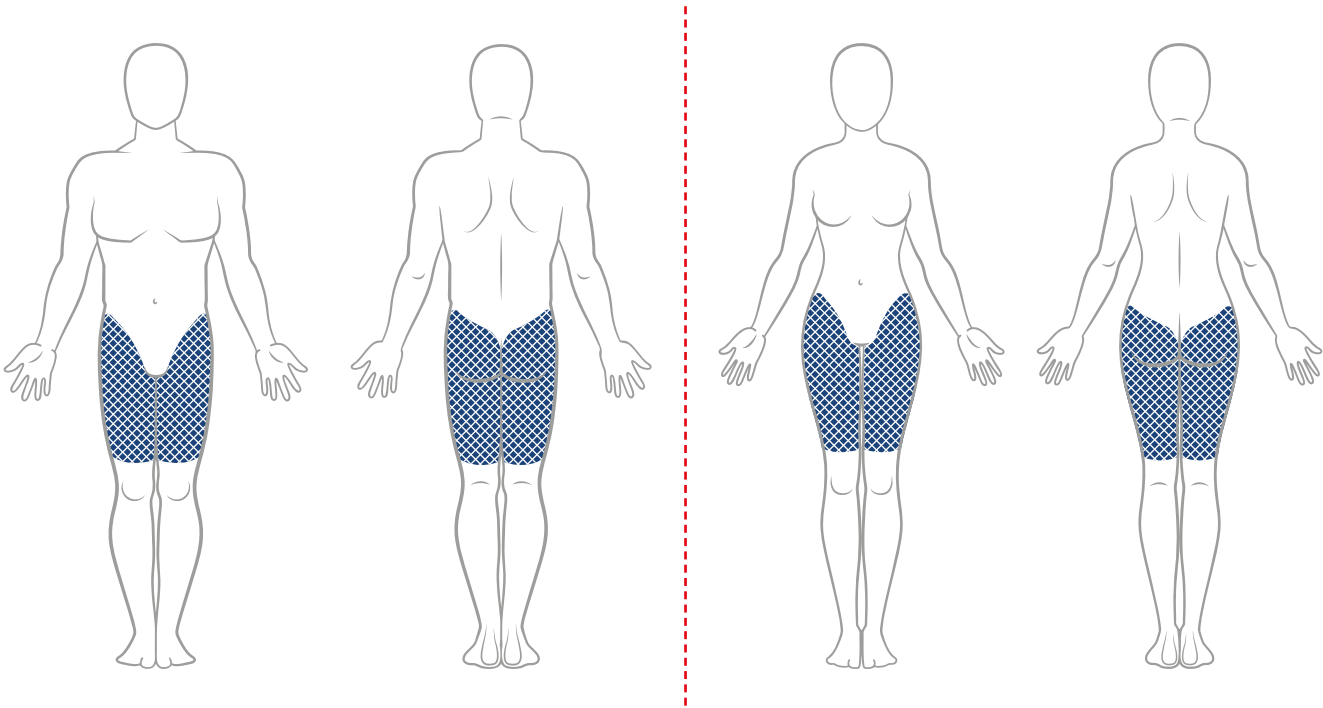

## 7 Hüftgelenke & Oberschenkel

7a. Hatten Sie während der letzten 12 Monate Beschwerden in den Hüftgelenken und/oder Oberschenkeln? Wenn ja, bitte addieren Sie alle Tage mit Beschwerden.

- Nein
  Ja, an 1-7 Tagen  
 Ja, an 8-30 Tagen  
 Ja, an mehr als 30 Tagen, aber nicht jeden Tag  
 Ja, (fast) jeden Tag

**Wenn Sie keine Beschwerden in den Hüftgelenken und/oder Oberschenkeln hatten, gehen Sie bitte zur Körperregion auf der nächsten Seite.**

7b. Haben diese Beschwerden Sie in den letzten 12 Monaten bei Ihren beruflichen Tätigkeiten oder in Ihrer Freizeit eingeschränkt?

- Nein
  Ja

7c. Hatten Sie diese Beschwerden auch irgendwann in den letzten 4 Wochen?

- Nein
  Ja

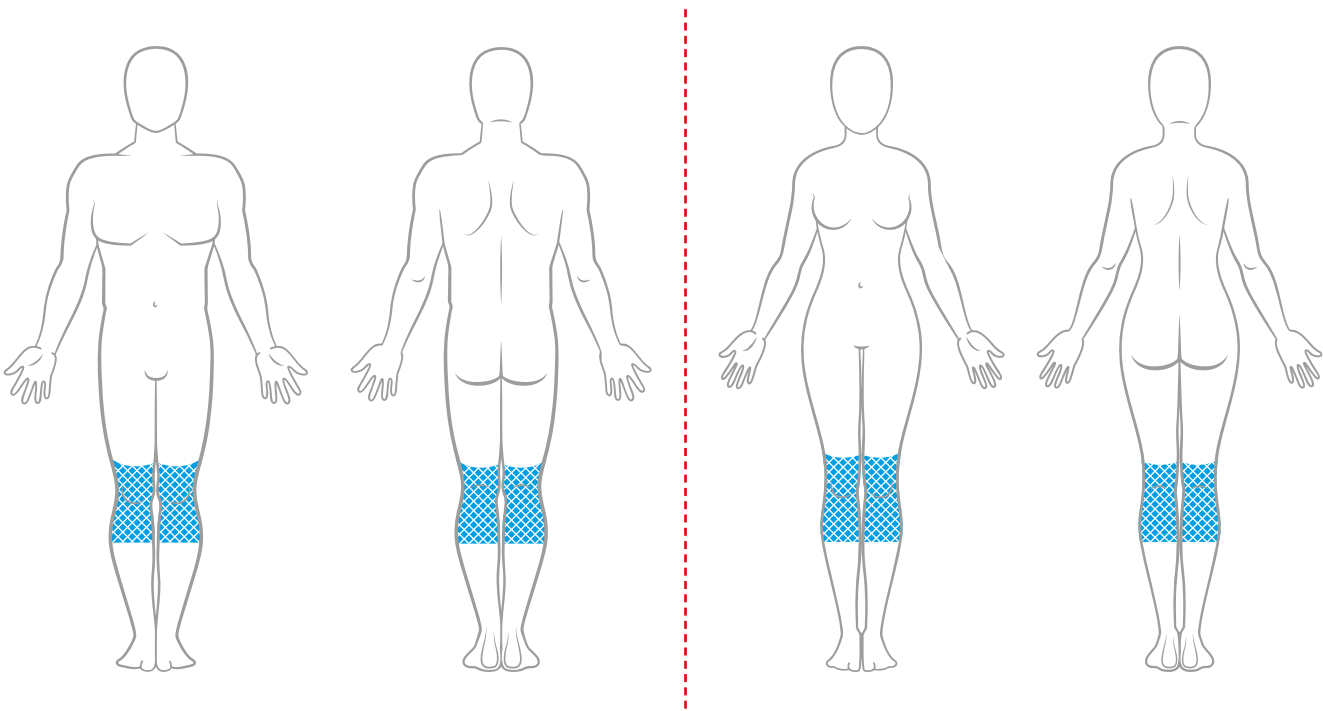

## 8 Kniegelenke

8a. Hatten Sie während der letzten 12 Monate Beschwerden in den Kniegelenken?  
Wenn ja, bitte addieren Sie alle Tage mit Beschwerden.

- Nein
  Ja, an 1-7 Tagen  
 Ja, an 8-30 Tagen  
 Ja, an mehr als 30 Tagen, aber nicht jeden Tag  
 Ja, (fast) jeden Tag

**Wenn Sie keine Beschwerden in den Kniegelenken hatten, gehen Sie bitte zur Körperregion auf der nächsten Seite.**

8b. Haben diese Beschwerden Sie in den letzten 12 Monaten bei Ihren beruflichen Tätigkeiten oder in Ihrer Freizeit eingeschränkt?

- Nein
  Ja

8c. Hatten Sie diese Beschwerden auch irgendwann in den letzten 4 Wochen

- Nein
  Ja

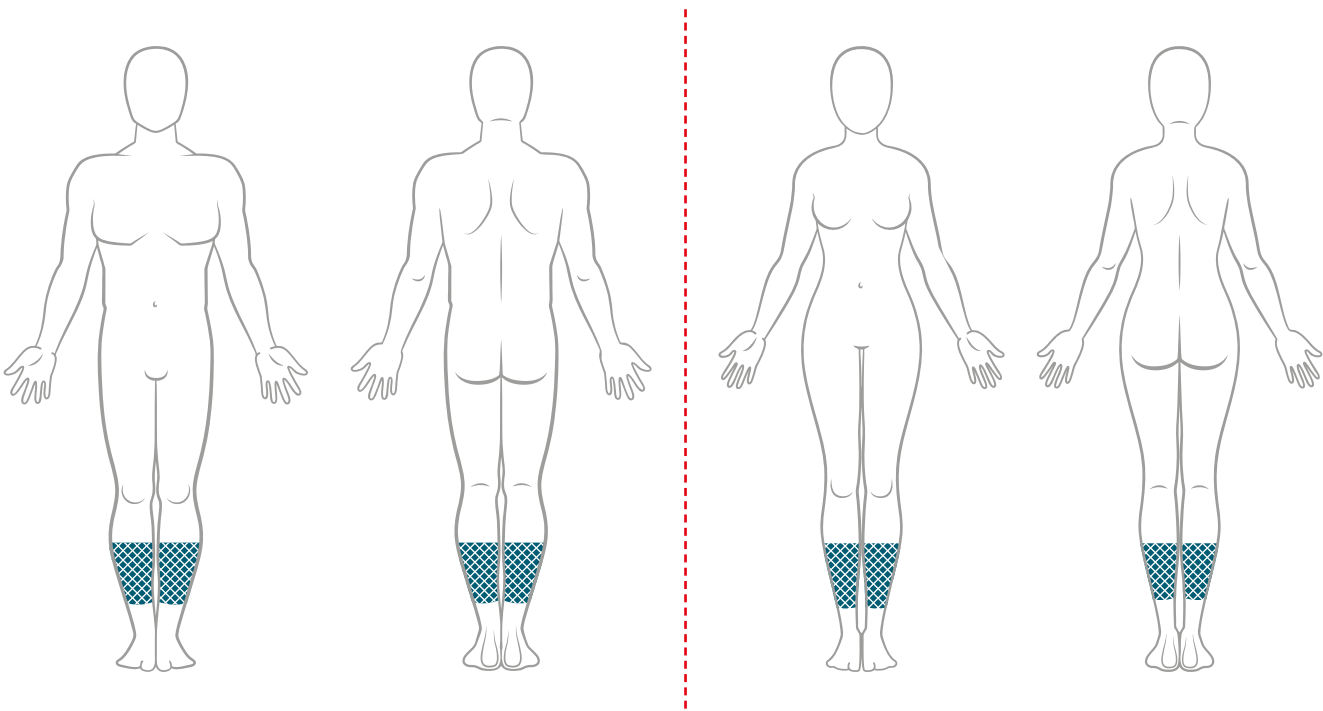

## 9 Unterschenkel

9a. Hatten Sie während der letzten 12 Monate Beschwerden in den Unterschenkeln?  
Wenn ja, bitte addieren Sie alle Tage mit Beschwerden.

- Nein
  Ja, an 1-7 Tagen  
 Ja, an 8-30 Tagen  
 Ja, an mehr als 30 Tagen, aber nicht jeden Tag  
 Ja, (fast) jeden Tag

**Wenn Sie keine Beschwerden in den Unterschenkeln hatten, gehen Sie bitte zur Körperregion auf der nächsten Seite.**

9b. Haben diese Beschwerden Sie in den letzten 12 Monaten bei Ihren beruflichen Tätigkeiten oder in Ihrer Freizeit eingeschränkt?

- Nein
  Ja

9c. Hatten Sie diese Beschwerden auch irgendwann in den letzten 4 Wochen?

- Nein
  Ja



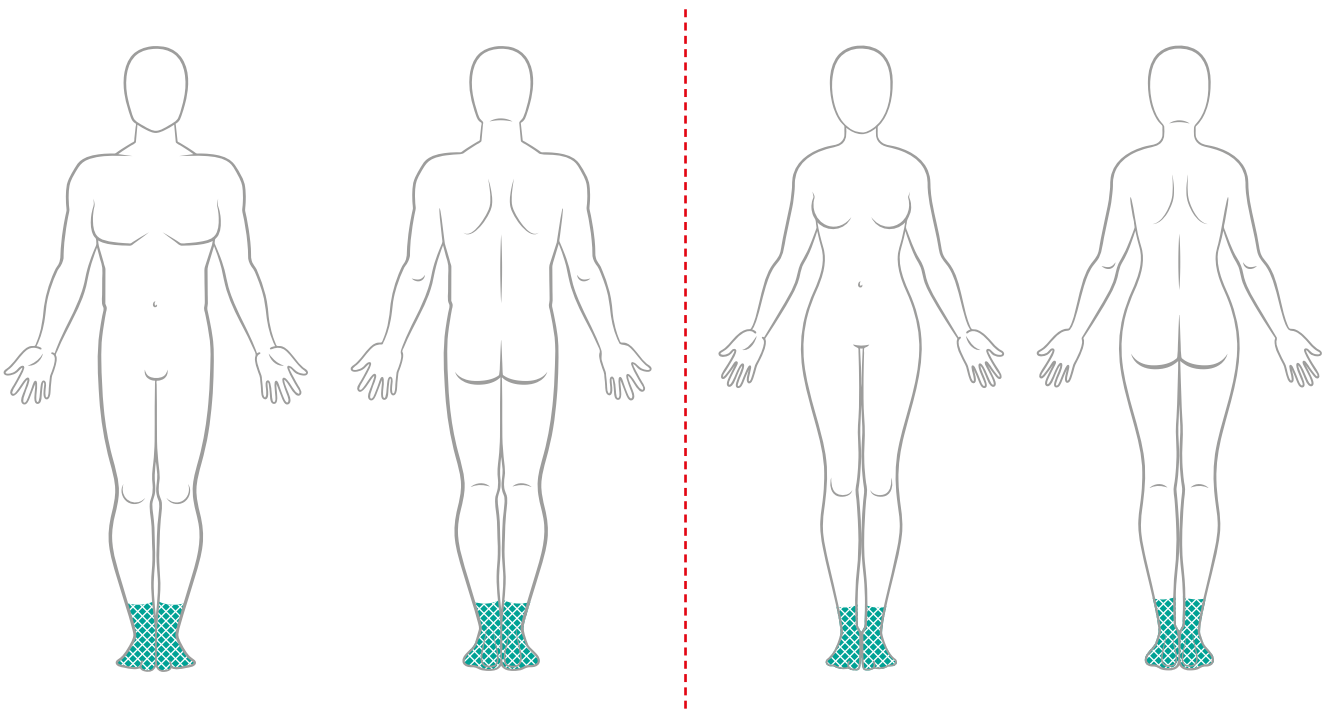

## 10 Fuß & Fußgelenk

10a. Hatten Sie während der letzten 12 Monate Beschwerden in den Füßen und/oder Fußgelenken? Wenn ja, bitte addieren Sie alle Tage mit Beschwerden.

- Nein
  Ja, an 1-7 Tagen  
 Ja, an 8-30 Tagen  
 Ja, an mehr als 30 Tagen, aber nicht jeden Tag  
 Ja, (fast) jeden Tag

**Wenn Sie keine Beschwerden in den Füßen und/oder Fußgelenken hatten, gehen Sie bitte zur Körperregion auf der nächsten Seite.**

10b. Haben diese Beschwerden Sie in den letzten 12 Monaten bei Ihren beruflichen Tätigkeiten oder in Ihrer Freizeit eingeschränkt?

- Nein
  Ja

10c. Hatten Sie diese Beschwerden auch irgendwann in den letzten 4 Wochen?

- Nein
  Ja

# Allgemeine Fragen

Datum: \_\_\_\_\_ . \_\_\_\_\_ . \_\_\_\_\_  
 Tag            Monat            Jahr

1. Welches Geschlecht haben Sie?

weiblich             männlich             divers

2. Wie alt sind Sie?

Lebensalter:   Jahre

3. Wie groß sind Sie?

Körpergröße:    cm

4. Wieviel wiegen Sie?

Körpergewicht:    kg

5. Welche berufliche Tätigkeit üben Sie derzeit hauptsächlich aus?<sup>1</sup>

Bitte beschreiben Sie Ihre berufliche Tätigkeit genau. Hat dieser Beruf, diese Tätigkeit noch einen besonderen Namen? Geben Sie bitte die genaue Bezeichnung an, also z. B. nicht Elektriker, sondern Elektroinstallateur; nicht Verkäufer, sondern Schuhverkäufer; nicht Sachbearbeiterin, sondern Buchhalterin.

---



---



---

6. Seit wann sind Sie in diesem Beruf tätig?

Ca. seit     (Jahr)

<sup>1</sup>\*aus DEGS (Studie zur Gesundheit Erwachsener in Deutschland) Gesundheitsfragebogen, 18 bis 64 Jahre, Robert Koch-Institut, Stand März 2009

## 7. Sind Sie zurzeit erwerbstätig?

Unter Erwerbstätigkeit wird jede bezahlte bzw. mit einem Einkommen verbundene Tätigkeit verstanden, egal welchen zeitlichen Umfang sie hat.

- Vollzeit erwerbstätig
- Teilzeit erwerbstätig
- Geringfügig erwerbstätig (450-Euro- oder Mini-Job)
- „Ein-Euro-Job“ (bei Bezug von Arbeitslosengeld II)
- Gelegentlich oder unregelmäßig beschäftigt
- Berufliche Ausbildung/Lehre
- Vorübergehend freigestellt/beurlaubt (z. B. Elternzeit)
- Nicht erwerbstätig

## 8. Wieviele Stunden arbeiten Sie normalerweise pro Woche?

Arbeitsstunden pro Woche

## 9. In welchem Wirtschaftszweig (Branche) arbeiten Sie zurzeit (bzw. haben Sie zuletzt gearbeitet)?

Tragen Sie bitte möglichst genau den Wirtschaftszweig des Betriebes ein, nicht des gesamten Unternehmens. Zum Beispiel: Werkzeugmaschinenbau (nicht Fabrik), Lebensmitteleinzelhandel (nicht Handel), Krankenhaus (nicht Dienstleistung).

---

---

---

**Bitte in Frage 10 nur eine berufliche Stellung ankreuzen!**

10. In welcher beruflichen Stellung sind Sie derzeit beschäftigt, bzw. (falls Sie derzeit nicht erwerbstätig sind) waren Sie zuletzt beschäftigt?

**Arbeiter/Arbeiterin**

- Ungelernte/r Arbeiter/in
- Angelernte/r Arbeiter/in
- Gelernte/r oder Facharbeiter/in
- Vorarbeiter/in, Kolonnenführer/in
- Meister/in, Polier/in, Brigadier/in

**Selbständige/Selbständiger****Selbständige/r Landwirt/in bzw. Genossenschaftsbauer/-bäuerin ...**

- mit einer landwirtschaftlich genutzten Fläche bis unter 10 ha
- mit einer landwirtschaftlich genutzten Fläche von 10 ha und mehr
- Genossenschaftsbauer/bäuerin (ehemals LPG)

**Akademiker im freien Beruf (Arzt/Ärztin, Rechtsanwalt/-anwältin, Steuerberater/in u. ä.) und habe/hatte ...**

- keine weiteren Mitarbeiter/innen
- 1 bis 4 Mitarbeiter/innen
- 5 und mehr Mitarbeiter/innen

**Sonstige Selbständige, auch Ich-AG oder PGH-Mitglied, und habe/hatte ...**

- keine weiteren Mitarbeiter/innen
- 1 bis 4 Mitarbeiter/innen
- 5 und mehr Mitarbeiter/innen
- PGH-Mitglied

**Fortsetzung auf der nächsten Seite.**

**Fortsetzung Frage 10.****Bitte in Frage 10 nur eine berufliche Stellung ankreuzen!**

## Beamter/Beamtin, Richter/in, Berufssoldat/in ...

im einfachen Dienst  
(bis einschließlich Oberamtsmeister/in)

im mittleren Dienst  
(von Assistent/in bis einschl. Hauptsekretär/in, Amtsinspektor/in)

im gehobenen Dienst  
(von Inspektor/in bis einschl. Oberamtsrat/-rätin)

im höheren Dienst, Richter/in, Professor/in u. a.  
(von Rat/Rätin aufwärts)

## Angestellte/Angestellter ...

mit ausführender Tätigkeit nach allg. Anweisung  
(z. B. Kassierer/in, Verkäufer/in, Datentypist/in, Pförtner/in o. ä.)

mit qualifizierter Tätigkeit, die Sie nach Anweisung erledigen  
(z. B. Sachbearbeiter/in, Buchhalter/in, techn. Zeichner/in)

mit eigenständiger Leistung in verantwortlicher Tätigkeit bzw.  
mit Fachverantwortung für Personal  
(z. B. wiss. Mitarbeiter/in, Prokurist/in, Abteilungsleiter/in,  
Meister/in im Angestelltenverhältnis)

mit umfassender Führungstätigkeit und Entscheidungsbefugnissen  
(z. B. Direktor/in, Geschäftsführer/in, Vorstand)

Mithelfende/r Familienangehörige/r

Sonstiges (z. B. Auszubildende/r, Schüler/in, Student/in,  
Wehrpflichtiger, Zivildienstleistender etc.)

11. Welchen höchsten allgemein bildenden Schulabschluss haben Sie?

- Haupt- oder Volksschulabschluss
- Realschulabschluss/Mittlere Reife/Fachschulreife
- POS (Polytechn. Oberschule) bzw. 10. Klasse (vor 1965: 8. Klasse)
- Fachhochschulreife/Abschluss einer Fachoberschule
- Abitur, allgemeine oder fachgebundene Hochschulreife
- Anderen Schulabschluss (z. B. im Ausland erworben)
- Schule beendet ohne Schulabschluss

12. Welchen höchsten beruflichen Ausbildungsabschluss bzw. Hochschulabschluss haben Sie?

- Noch in beruflicher Ausbildung  
(Auszubildende/r, Student/in, Berufsvorbereitungsjahr)
- Keinen Berufsabschluss und nicht in beruflicher Ausbildung
- Berufliche-betriebliche Ausbildung (Lehre) abgeschlossen
- Beruflich-schulische Ausbildung  
(Berufsfachschule, Handelsschule, Vorbereitungsdienst für den  
mittleren Dienst der öffentlichen Verwaltung) abgeschlossen
- Ausbildung an einer Fachschule, Meister-, Technikerschule,  
Berufs- oder Fachakademie abgeschlossen
- Bachelor an (Fach-)Hochschule abgeschlossen
- Sonstigen Abschluss an einer Fachhochschule oder Ingenieurschule
- Sonstigen Abschluss an einer Universität oder Hochschule
- Anderen Ausbildungsabschluss

## Evaluationsfragebogen zum Nordischen Fragebogen zu Beschwerden im Muskel-Skelett-System (NFB\*MSB)

|                                                                                                                                                                                                |                         |                          |
|------------------------------------------------------------------------------------------------------------------------------------------------------------------------------------------------|-------------------------|--------------------------|
| <b>1. Wie viel Zeit haben Sie zum Ausfüllen des Nordischen Fragebogen zu Beschwerden im Muskel-Skelett-System (NFB*MSB) benötigt? (Bitte kreuzen Sie die am besten zutreffende Angabe an.)</b> | • Weniger als 5 Minuten | <input type="checkbox"/> |
|                                                                                                                                                                                                | • 5 bis < 10 Minuten    | <input type="checkbox"/> |
|                                                                                                                                                                                                | • 10 bis < 15 Minuten   | <input type="checkbox"/> |
|                                                                                                                                                                                                | • 15 bis < 30 Minuten   | <input type="checkbox"/> |
|                                                                                                                                                                                                | • 30 Minuten oder mehr  | <input type="checkbox"/> |

| <b>2. Wie beurteilen Sie den Nordischen Fragebogen zu Beschwerden im Muskel-Skelett-System (NFB*MSB) hinsichtlich folgender Aspekte? Treffen die Aussagen aus Ihrer Sicht zu? (Bitte kreuzen Sie pro Zeile die am besten zutreffende Antwort an.)</b> | <b>Trifft voll und ganz zu.</b> | <b>Trifft eher zu.</b>   | <b>Trifft eher nicht zu.</b> | <b>Trifft überhaupt nicht zu.</b> |
|-------------------------------------------------------------------------------------------------------------------------------------------------------------------------------------------------------------------------------------------------------|---------------------------------|--------------------------|------------------------------|-----------------------------------|
| a. Das Thema des Fragebogens finde ich interessant.                                                                                                                                                                                                   | <input type="checkbox"/>        | <input type="checkbox"/> | <input type="checkbox"/>     | <input type="checkbox"/>          |
| b. Der Umfang des Fragebogens ist für mich akzeptabel.                                                                                                                                                                                                | <input type="checkbox"/>        | <input type="checkbox"/> | <input type="checkbox"/>     | <input type="checkbox"/>          |
| c. Die „Hinweise zum Ausfüllen des Fragebogens“ (Seite 4) sind für mich verständlich.                                                                                                                                                                 | <input type="checkbox"/>        | <input type="checkbox"/> | <input type="checkbox"/>     | <input type="checkbox"/>          |
| d. Den Aufbau des Fragebogens finde ich klar, logisch und übersichtlich.                                                                                                                                                                              | <input type="checkbox"/>        | <input type="checkbox"/> | <input type="checkbox"/>     | <input type="checkbox"/>          |
| e. Die Formulierung der Fragen ist für mich verständlich.                                                                                                                                                                                             | <input type="checkbox"/>        | <input type="checkbox"/> | <input type="checkbox"/>     | <input type="checkbox"/>          |
| f. Die im Fragebogen verwendete Schrift ist für mich gut leserlich.                                                                                                                                                                                   | <input type="checkbox"/>        | <input type="checkbox"/> | <input type="checkbox"/>     | <input type="checkbox"/>          |
| g. Die Abbildungen der jeweiligen Körperregionen finde ich aussagekräftig und verständlich.                                                                                                                                                           | <input type="checkbox"/>        | <input type="checkbox"/> | <input type="checkbox"/>     | <input type="checkbox"/>          |
| h. Die Fragen zu meiner derzeitigen beruflichen Stellung sind für mich verständlich.                                                                                                                                                                  | <input type="checkbox"/>        | <input type="checkbox"/> | <input type="checkbox"/>     | <input type="checkbox"/>          |

**3. Sind die Fragen oder Aussagen im Nordischen Fragebogen zu Beschwerden im Muskel-Skelett-System (NFB\*MSB) unklar oder missverständlich formuliert? Falls zutreffend, erläutern Sie bitte kurz das Problem. Sie können gern auch eine Lösungsmöglichkeit vorschlagen.**

Nein Ja:

---



---



---



---



**4. Gibt es aus Ihrer Sicht noch wichtige Aspekte, die im Nordischen Fragebogen zu Beschwerden im Muskel-Skelett-System (NFB\*MSB) fehlen? Wenn ja, bitte kurz benennen.**

Nein Ja:

---

---

---

---

---

---

---

**5. Haben Sie noch weitere Anmerkungen zum Nordischen Fragebogen zu Beschwerden im Muskel-Skelett-System (NFB\*MSB)?**

Nein Ja:

---

---

---

---

---

---

---

Vielen Dank für Ihre Teilnahme!
