# Supplementary material for: Neuer deutschsprachiger Fragebogen zur standardisierten Erfassung von Muskel-Skelett-Beschwerden im Betrieb
Source: Springer Nature journal article supplement (doi:10.1007/s40664-023-00516-x), 2023-09-07
Supplement: MOESM2 [file 26015870]

## Der Fragenkatalog zum NFB\*MSB

### 1. Zu inhaltlichen Aspekten des NFB\*MSB?

Frage 1.1: Mit dem Fragebogen soll die Prävalenz an Beschwerden in zehn Gelenkregionen erfasst werden. Wie beurteilen Sie die Auswahl, die Bezeichnung und die anatomische Markierung der Gelenkregion, für die Beschwerden abgefragt werden?

Ihre Antwort:

Frage 1.2: Im Fragebogen wird generell der Begriff „Beschwerden“ verwendet. Wie beurteilen Sie dies?

Ihre Antwort:

Frage 1.3: Die Prävalenz von Beschwerden in den letzten 12 Monaten wird ordinal mit Bezug zur kumulativen Dauer der Beschwerden (1-7 Tage usw.) erfasst. Wie beurteilen Sie dies?

Ihre Antwort:

Frage 1.4: Hinweise auf funktionelle Einschränkungen beziehen sich auf berufliche Tätigkeiten oder in der Freizeit im Zusammenhang mit Beschwerden in den letzten 12 Monaten. Wie beurteilen Sie dies?

Ihre Antwort:

Frage 1.5: Als weitere Periodenprävalenz wird einheitlich und dichotom das Auftreten von Beschwerden in den letzten 4 Wochen erfasst? Wie beurteilen Sie dies?

Ihre Antwort:

Frage 1.6: Funktionelle Einschränkungen und die 4-Wochenprävalenz werden nur erhoben, wenn überhaupt Beschwerden in den letzten 12 Monaten aufgetreten sind. Wie beurteilen Sie die Verwendung der Sprungfrage?

Ihre Antwort:

Frage 1.7: Um den Fragebogen für alle Gelenkregionen einheitlich und einfach zu gestalten, wurde auf die Lateralität der Beschwerden (rechts/links) bewusst verzichtet. Wie beurteilen Sie dies?

Ihre Antwort:

Frage 1.8: Neben dem eigentlichen Beschwerdefragebogen enthält der Fragebogen auch einen Abschnitt mit allgemeine Fragen zur Person und zur beruflichen Stellung. Diese Informationen sind aus unserer Sicht wichtig, um die Beschwerden ggf. einordnen zu können. Wie beurteilen Sie diesen Abschnitt? Was fehlt? Welche Aspekte sind entbehrlich?

Ihre Antwort:

Frage 1.9: Welche weiteren Fakten sollten Ihrer Meinung nach abgefragt werden, um Beschwerden im Muskel-Skelett-System im Kontext der beruflichen Tätigkeit zu erfassen?

Ihre Antwort:

## 2. Zur Praktikabilität des NFB\*MSB-Fragebogens

Frage 2.1: Sind die Hinweise zum Ausfüllen des Fragebogens verständlich?

Ihre Antwort:

Frage 2.2: Ist der generelle Aufbau des Fragebogens klar, logisch und übersichtlich?

Ihre Antwort:

Frage 2.3: Sind die Formulierungen der Fragen klar und verständlich?

Ihre Antwort:

Frage 2.4: Ist die Länge des Fragebogens (Anzahl der Fragen, Anzahl der Seiten) angemessen?

Ihre Antwort:

Frage 2.5: Wie schätzen Sie den Zeitaufwand, der zum Ausfüllen des NFB\*MSB im betrieblichen Setting voraussichtlich benötigt wird, ein?

Ihre Antwort:

## 3. Zur formellen Gestaltung der Broschüre mit dem Fragebogen?

Frage 3.1: Wie beurteilen Sie generell die formelle Gestaltung des Fragebogens?

Ihre Antwort:

Frage 3.2: Halten Sie die Schriftgröße für gut leserlich und ansprechend?

Ihre Antwort:

Frage 3.3: Wie beurteilen Sie generell die grafische Darstellung der Körperformen?

Ihre Antwort:

Frage 3.4: Ist die Darstellung der männlichen und weiblichen Person so akzeptabel?

Ihre Antwort:

#### 4. Generelle Aspekte

Frage 4.1: Für welche Populationen im beruflichen Setting eignet sich aus Ihrer Sicht der NFB\*MSB? Für welche nicht?

Ihre Antwort:

Frage 4.2: Gibt es aus Ihrer Sicht noch andere wichtige Aspekte, die in dem neuen Fragebogen zu Beschwerden im Muskel-Skelett-System (NFB\*MSB) fehlen? Haben Sie noch weitere Anmerkungen zum neuen Fragebogen?

Ihre Antwort:

Frage 4.3: Würden Sie selbst den Fragebogen in einer betrieblichen Studie einsetzen oder würden Sie den Fragebogen Ihren Kollegen zum Einsatz empfehlen?

Ihre Antwort: Ja     Nein

Warum:

Sie haben es geschafft! Vielen Dank für Ihre Zeit und Ihre Unterstützung.

Mit freundlichen Grüßen

Dr. Falk Liebers (für das Projektteam)
