# Supplementary material for: Neuer deutschsprachiger Fragebogen zur standardisierten Erfassung von Muskel-Skelett-Beschwerden im Betrieb
Source: Springer Nature journal article supplement (doi:10.1007/s40664-023-00516-x), 2023-09-07
Supplement: MOESM3 [file 26015870]

## Online-Zusatzmaterial

**Tab. ZM 3.1** Antwortstabilität (Test-Retest-Reliabilität) der 12-Monats-Prävalenz zwischen den Messzeitpunkten T1 und T2 nach Körperregion

| Körperregion                              | Antworten zu T1                                | Antwort zu T2                                                |                  |                   |                                                |                      | gesamt Spalten % (n) | ICC      | KI         | F (df)      |
|-------------------------------------------|------------------------------------------------|--------------------------------------------------------------|------------------|-------------------|------------------------------------------------|----------------------|----------------------|----------|------------|-------------|
|                                           |                                                | Gesamt: Zeilen % (n), in den Antwortkategorien: Zellen % (n) |                  |                   |                                                |                      |                      |          |            |             |
|                                           |                                                | Nein                                                         | Ja, an 1–7 Tagen | Ja, an 8–30 Tagen | Ja, an mehr als 30 Tagen, aber nicht jeden Tag | Ja, (fast) jeden Tag |                      |          |            |             |
| <b>(1) Nacken &amp; Halswirbelsäule</b>   | Nein                                           | 12,6 % (10)                                                  | 2,5 % (2)        | -                 | -                                              | -                    | 15,1 % (12)          | 0,878*** | 0,815–0,92 | 15,217 (78) |
|                                           | Ja, an 1–7 Tagen                               | 5 % (4)                                                      | 13,9 % (11)      | 3,7 % (3)         | 1,2 % (1)                                      | -                    | 24 % (19)            |          |            |             |
|                                           | Ja, an 8–30 Tagen                              | -                                                            | 6,3 % (5)        | 13,9 % (11)       | 7,5 % (6)                                      | -                    | 27,8 % (22)          |          |            |             |
|                                           | Ja, an mehr als 30 Tagen, aber nicht jeden Tag | -                                                            | -                | 3,7 % (3)         | 12,6 % (10)                                    | 3,7 % (3)            | 20,2 % (16)          |          |            |             |
|                                           | Ja, (fast) jeden Tag                           | -                                                            | -                | -                 | 2,5 % (2)                                      | 10,1 % (8)           | 12,6 % (10)          |          |            |             |
|                                           | gesamt                                         | 17,7 % (14)                                                  | 22,7 % (18)      | 21,5 % (17)       | 24,0 % (19)                                    | 13,9 % (11)          | 100 % (79)           |          |            |             |
| <b>(2) Schultergelenke &amp; Oberarme</b> | Nein                                           | 38,7 % (31)                                                  | 7,5 % (6)        | -                 | 1,2 % (1)                                      | 1,2 % (1)            | 48,7 % (39)          | 0,761*** | 0,65–0,839 | 7,321 (79)  |
|                                           | Ja, an 1–7 Tagen                               | 1,2 % (1)                                                    | 6,2 % (5)        | 2,5 % (2)         | 2,5 % (2)                                      | -                    | 12,5 % (10)          |          |            |             |
|                                           | Ja, an 8–30 Tagen                              | 2,5 % (2)                                                    | 2,5 % (2)        | 8,7 % (7)         | 1,2 % (1)                                      | -                    | 15,0 % (12)          |          |            |             |
|                                           | Ja, an mehr als 30 Tagen, aber nicht jeden Tag | -                                                            | 1,2 % (1)        | 6,2 % (5)         | 13,7 % (11)                                    | -                    | 21,2 % (17)          |          |            |             |
|                                           | Ja, (fast) jeden Tag                           | -                                                            | -                | -                 | 1,2 % (1)                                      | 1,2 % (1)            | 2,5 % (2)            |          |            |             |
|                                           | gesamt                                         | 42,5 % (34)                                                  | 17,5 % (14)      | 17,5 % (14)       | 20,0 % (16)                                    | 2,5 % (2)            | 100 % (80)           |          |            |             |
| <b>(3) Ellenbogen &amp; Unterarme</b>     | Nein                                           | 45 (56,2)                                                    | 5 % (4)          | -                 | -                                              | -                    | 61,2 % (49)          | 0,791*** | 0,692–0,86 | 8,657 (79)  |
|                                           | Ja, an 1–7 Tagen                               | 6,2 % (5)                                                    | 5 % (4)          | 3,7 % (3)         | -                                              | -                    | 15,0 % (12)          |          |            |             |
|                                           | Ja, an 8–30 Tagen                              | 3,7 % (3)                                                    | 1,2 % (1)        | 5 % (4)           | 3,7 % (3)                                      | -                    | 13,7 % (11)          |          |            |             |
|                                           | Ja, an mehr als 30 Tagen, aber nicht jeden Tag | -                                                            | -                | 5 % (4)           | 3,7 % (3)                                      | -                    | 8,7 % (7)            |          |            |             |
|                                           | Ja, (fast) jeden Tag                           | -                                                            | -                | 1,2 % (1)         | -                                              | -                    | 1,2 % (1)            |          |            |             |
|                                           | Gesamt                                         | 66,2 % (53)                                                  | 11,2 % (9)       | 15,0 % (12)       | 7,5 % (6)                                      | -                    | 100 % (80)           |          |            |             |

(Fortsetzung von Tab. ZM 3.1)

| Körperregion                                                    | Antworten zu T1                                   | Antwort zu T2                                                |                     |                      |                                                   |                         | gesamt<br>Spalten % (n) | ICC      | KI          | F (df)        |
|-----------------------------------------------------------------|---------------------------------------------------|--------------------------------------------------------------|---------------------|----------------------|---------------------------------------------------|-------------------------|-------------------------|----------|-------------|---------------|
|                                                                 |                                                   | Gesamt: Zeilen % (n), in den Antwortkategorien: Zellen % (n) |                     |                      |                                                   |                         |                         |          |             |               |
|                                                                 |                                                   | Nein                                                         | Ja, an<br>1–7 Tagen | Ja, an<br>8–30 Tagen | Ja, an mehr als 30 Tagen,<br>aber nicht jeden Tag | Ja, (fast)<br>jeden Tag |                         |          |             |               |
| <b>(4) Hände &amp;<br/>Handgelenke</b>                          | Nein                                              | 41 % (32)                                                    | 1,2 % (1)           | 2,5 % (2)            | -                                                 | -                       | 44,8 % (35)             | 0,792*** | 0,69–0,863  | 8,948<br>(77) |
|                                                                 | Ja, an 1–7 Tagen                                  | 10,2 % (8)                                                   | 11,5 % (9)          | 3,8 % (3)            | -                                                 | -                       | 25,6 % (20)             |          |             |               |
|                                                                 | Ja, an 8–30 Tagen                                 | 1,2 % (1)                                                    | 2,5 % (2)           | 3,8 % (3)            | 2,5 % (2)                                         | -                       | 10,2 % (8)              |          |             |               |
|                                                                 | Ja, an mehr als 30 Tagen,<br>aber nicht jeden Tag | 1,2 % (1)                                                    | 1,2 % (1)           | 1,2 % (1)            | 5,1 % (4)                                         | -                       | 8,9 % (7)               |          |             |               |
|                                                                 | Ja, (fast) jeden Tag                              | -                                                            | -                   | 3,8 % (3)            | 1,2 % (1)                                         | 5,1 % (4)               | 10,2 % (8)              |          |             |               |
|                                                                 | <b>Gesamt</b>                                     | <b>53,8 % (42)</b>                                           | <b>16,6 % (13)</b>  | <b>15,3 % (12)</b>   | <b>8,9 % (7)</b>                                  | <b>5,1 % (4)</b>        | <b>100 % (78)</b>       |          |             |               |
| <b>(5) Brust-<br/>wirbelsäule</b>                               | Nein                                              | 38,4 % (30)                                                  | 5,1 % (4)           | 1,2 % (1)            | 1,2 % (1)                                         | 1,2 % (1)               | 47,4 % (37)             | 0,746*** | 0,628–0,83  | 6,796<br>(77) |
|                                                                 | Ja, an 1–7 Tagen                                  | 8,9 % (7)                                                    | 5,1 % (4)           | 3,8 % (3)            | 1,2 % (1)                                         | -                       | 19,2 % (15)             |          |             |               |
|                                                                 | Ja, an 8–30 Tagen                                 | -                                                            | 5,1 % (4)           | 7,6 % (6)            | 2,5 % (2)                                         | -                       | 15,3 % (12)             |          |             |               |
|                                                                 | Ja, an mehr als 30 Tagen,<br>aber nicht jeden Tag | 1,2 % (1)                                                    | -                   | 5,1 % (4)            | 5,1 % (4)                                         | -                       | 11,5 % (9)              |          |             |               |
|                                                                 | Ja, (fast) jeden Tag                              | 0 (0)                                                        | -                   | -                    | 1,2 % (1)                                         | 5,1 % (4)               | 6,4 % (5)               |          |             |               |
|                                                                 | <b>Gesamt</b>                                     | <b>48,7 % (38)</b>                                           | <b>15,3 % (12)</b>  | <b>17,9 % (14)</b>   | <b>11,5 % (9)</b>                                 | <b>6,4 % (5)</b>        | <b>100 % (78)</b>       |          |             |               |
| <b>(6) Lenden-<br/>wirbelsäule &amp;<br/>unterer<br/>Rücken</b> | Nein                                              | 18,7 % (15)                                                  | 1,2 % (1)           | 1,2 % (1)            | -                                                 | -                       | 21,2 % (17)             | 0,784*** | 0,683–0,855 | 8,296<br>(79) |
|                                                                 | Ja, an 1–7 Tagen                                  | 5 % (4)                                                      | 6,2 % (5)           | 2,5 % (2)            | -                                                 | 1,2 % (1)               | 15 % (12)               |          |             |               |
|                                                                 | Ja, an 8–30 Tagen                                 | 1,2 % (1)                                                    | 2,5 % (2)           | 12,5 (10)            | 5 % (4)                                           | 1,2 % (1)               | 22,5 % (18)             |          |             |               |
|                                                                 | Ja, an mehr als 30 Tagen,<br>aber nicht jeden Tag | -                                                            | 2,5 % (2)           | 5 % (4)              | 20 % (16)                                         | -                       | 27,5 % (22)             |          |             |               |
|                                                                 | Ja, (fast) jeden Tag                              | 1,2 % (1)                                                    | 0 (0)               | 0 (0)                | 3,7 % (3)                                         | 8,7 % (7)               | 13,7 % (11)             |          |             |               |
|                                                                 | <b>Gesamt</b>                                     | <b>26,2 % (21)</b>                                           | <b>12,5 % (10)</b>  | <b>21,2 % (17)</b>   | <b>28,7 % (23)</b>                                | <b>11,2 % (9)</b>       | <b>100 % (80)</b>       |          |             |               |

(Fortsetzung von Tab. ZM 3.1)

| Körperregion                                        | Antworten zu T1                                   | Antwort zu T2                                                |                     |                      |                                                   |                         | gesamt<br>Spalten % (n) | ICC      | KI          | F (df)         |
|-----------------------------------------------------|---------------------------------------------------|--------------------------------------------------------------|---------------------|----------------------|---------------------------------------------------|-------------------------|-------------------------|----------|-------------|----------------|
|                                                     |                                                   | Gesamt: Zeilen % (n), in den Antwortkategorien: Zellen % (n) |                     |                      |                                                   |                         |                         |          |             |                |
|                                                     |                                                   | Nein                                                         | Ja, an<br>1–7 Tagen | Ja, an<br>8–30 Tagen | Ja, an mehr als 30 Tagen,<br>aber nicht jeden Tag | Ja, (fast)<br>jeden Tag |                         |          |             |                |
| <b>(7) Hüftge-<br/>lenke &amp;<br/>Oberschenkel</b> | Nein                                              | 55,6 % (44)                                                  | 1,2 % (1)           | 1,2 % (1)            | 1,2 % (1)                                         | 1,2 % (1)               | <b>60,7 % (48)</b>      | 0,725*** | 0,601–0,814 | 6,253<br>(78)  |
|                                                     | Ja, an 1–7 Tagen                                  | 3,7 % (3)                                                    | 5,0 % (4)           | -                    | -                                                 | -                       | <b>8,8 % (7)</b>        |          |             |                |
|                                                     | Ja, an 8–30 Tagen                                 | 3,7 % (3)                                                    | 2,5 % (2)           | 6,3 % (5)            | 1,2 % (1)                                         | -                       | <b>13,9 % (11)</b>      |          |             |                |
|                                                     | Ja, an mehr als 30 Tagen,<br>aber nicht jeden Tag | 1,2 % (1)                                                    | 2,5 % (2)           | -                    | 8,8 % (7)                                         | 1,2 % (1)               | <b>13,9 % (11)</b>      |          |             |                |
|                                                     | Ja, (fast) jeden Tag                              | -                                                            | -                   | -                    | 1,2 % (1)                                         | 1,2 % (1)               | <b>2,5 % (2)</b>        |          |             |                |
|                                                     | <b>Gesamt</b>                                     | <b>64,5 % (51)</b>                                           | <b>11,3 % (9)</b>   | <b>7,5 % (6)</b>     | <b>12,6 % (10)</b>                                | <b>3,7 % (3)</b>        | <b>100 % (79)</b>       |          |             |                |
| <b>(8) Kniege-<br/>lenke</b>                        | Nein                                              | 36,2 % (29)                                                  | 2,5 % (2)           | -                    | -                                                 | -                       | <b>38,7 % (31)</b>      | 0,887*** | 0,828–0,925 | 16,857<br>(79) |
|                                                     | Ja, an 1–7 Tagen                                  | 5 % (4)                                                      | 11,2 % (9)          | 2,5 % (2)            | 1,2 % (1)                                         | -                       | <b>20 % (16)</b>        |          |             |                |
|                                                     | Ja, an 8–30 Tagen                                 | 2,5 % (2)                                                    | 3,7 % (3)           | 12,5 % (10)          | 1,2 % (1)                                         | -                       | <b>20 % (16)</b>        |          |             |                |
|                                                     | Ja, an mehr als 30 Tagen,<br>aber nicht jeden Tag | -                                                            | 1,2 % (1)           | 3,7 % (3)            | 7,5 % (6)                                         | 1,2 % (1)               | <b>13,7 % (11)</b>      |          |             |                |
|                                                     | Ja, (fast) jeden Tag                              | -                                                            | -                   | -                    | -                                                 | 7,5 % (6)               | <b>7,5 % (6)</b>        |          |             |                |
|                                                     | <b>Gesamt</b>                                     | <b>43,7 % (35)</b>                                           | <b>18,7 % (15)</b>  | <b>18,7 % (15)</b>   | <b>10,0 % (8)</b>                                 | <b>8,7 % (7)</b>        | <b>100 % (80)</b>       |          |             |                |
| <b>(9) Unter-<br/>schenkel</b>                      | Nein                                              | 75,0 % (60)                                                  | 1,2 % (1)           | 1,2 % (1)            | -                                                 | -                       | <b>77,5 % (62)</b>      | 0,773*** | 0,667–0,848 | 7,835<br>(79)  |
|                                                     | Ja, an 1–7 Tagen                                  | 3,7 % (3)                                                    | 2,5 % (2)           | 1,2 % (1)            | -                                                 | -                       | <b>7,5 % (6)</b>        |          |             |                |
|                                                     | Ja, an 8–30 Tagen                                 | 2,5 % (2)                                                    | 1,2 % (1)           | 1,2 % (1)            | 2,5 % (2)                                         | -                       | <b>7,5 % (6)</b>        |          |             |                |
|                                                     | Ja, an mehr als 30 Tagen,<br>aber nicht jeden Tag | 1,2 % (1)                                                    | -                   | 1,2 % (1)            | 5 % (4)                                           | -                       | <b>7,5 % (6)</b>        |          |             |                |
|                                                     | Ja, (fast) jeden Tag                              | -                                                            | -                   | -                    | -                                                 | -                       | -                       |          |             |                |
|                                                     | <b>Gesamt</b>                                     | <b>82,5 % (66)</b>                                           | <b>5 % (4)</b>      | <b>5 % (4)</b>       | <b>7,5 % (6)</b>                                  | -                       | <b>100 % (80)</b>       |          |             |                |

(Fortsetzung von Tab. ZM 3.1)

| Körperregion                          | Antworten zu T1                                   | Antwort zu T2                                                |                     |                      |                                                   |                         | gesamt<br>Spalten % (n) | ICC      | KI          | F (df)        |
|---------------------------------------|---------------------------------------------------|--------------------------------------------------------------|---------------------|----------------------|---------------------------------------------------|-------------------------|-------------------------|----------|-------------|---------------|
|                                       |                                                   | Gesamt: Zeilen % (n), in den Antwortkategorien: Zellen % (n) |                     |                      |                                                   |                         |                         |          |             |               |
|                                       |                                                   | Nein                                                         | Ja, an<br>1–7 Tagen | Ja, an<br>8–30 Tagen | Ja, an mehr als 30 Tagen,<br>aber nicht jeden Tag | Ja, (fast)<br>jeden Tag |                         |          |             |               |
| <b>(10) Füße &amp;<br/>Fußgelenke</b> | Nein                                              | 46,2 % (37)                                                  | 2,5 % (2)           | 3,7 % (3)            | -                                                 | -                       | <b>52,5 % (42)</b>      | 0,671*** | 0,531–0,775 | 5,099<br>(79) |
|                                       | Ja, an 1–7 Tagen                                  | 10,0 % (8)                                                   | 6,2 % (5)           | 3,7 % (3)            | 1,2 % (1)                                         | -                       | <b>21,2 % (17)</b>      |          |             |               |
|                                       | Ja, an 8–30 Tagen                                 | 2,5 % (2)                                                    | 1,2 % (1)           | 6,2 % (5)            | 1,2 % (1)                                         | -                       | <b>11,2 % (9)</b>       |          |             |               |
|                                       | Ja, an mehr als 30 Tagen,<br>aber nicht jeden Tag | 3,7 % (3)                                                    | 1,2 % (1)           | -                    | 6,2 % (5)                                         | 1,2 % (1)               | <b>12,5 % (10)</b>      |          |             |               |
|                                       | Ja, (fast) jeden Tag                              | -                                                            | -                   | -                    | 1,2 % (1)                                         | 1,2 % (1)               | <b>2,5 % (2)</b>        |          |             |               |
|                                       | <b>Gesamt</b>                                     | <b>62,5 % (50)</b>                                           | <b>11,2 % (9)</b>   | <b>13,7 % (11)</b>   | <b>10,0 % (8)</b>                                 | <b>2,5 % (2)</b>        | <b>100 % (80)</b>       |          |             |               |

\*\*\* p &lt; .001

Legende: Abkürzungen: ICC = Intraklassen-Korrelationskoeffizient; df = Freiheitsgrade (degrees of freedom); F = F-Wert für das Verhältnis von zwei Varianzen (Streuungsmaß); KI = Konfidenzintervall (95 %). Zellen auf der Diagonale mit übereinstimmenden Antworten zwischen T1 und T2 sind für alle Gelenkregionen blau hinterlegt; nicht übereinstimmende Antworten liegen außerhalb der Diagonale.

**Tab. ZM 3.2** Kategorisierte Antworten der Teilnehmenden zu den offenen Fragen im Feedback-Fragebogen zum Nordischen Fragebogen zu Muskel-Skelett-Beschwerden (NFB\*MSB)

| Kategorie                                               | Unterkategorie                                   | Anzahl Antworten        |
|---------------------------------------------------------|--------------------------------------------------|-------------------------|
| <b>Fehlende Aspekte im Fragebogen</b>                   | Unterstützung durch Arbeitgeber erfassen         | 2                       |
|                                                         | Arbeitsunfähigkeit erfassen                      | 4                       |
|                                                         | Art der beruflichen Einschränkung erfassen       | 4                       |
|                                                         | Dauer der Funktionseinschränkung erfassen        | 1                       |
|                                                         | Digitalisierung als Ursache bedenken             | 1                       |
|                                                         | Psychische Komponente als Ursache erfassen       | 1                       |
|                                                         | Schmerzart erfassen                              | 6                       |
|                                                         | Schmerzintensität erfassen                       | 4                       |
|                                                         | Sportliche Aktivitäten erfassen                  | 1                       |
|                                                         | Tätigkeiten/Belastung am Arbeitsplatz erfassen   | 8                       |
|                                                         | Erfolgte Therapien erfassen                      | 4                       |
|                                                         | Ursache der Beschwerden erfassen                 | 13                      |
|                                                         | Vorerkrankungen erfassen                         | 10                      |
|                                                         | Sonstiges                                        | 1                       |
|                                                         | <b>Gesamt</b>                                    | <b>60</b>               |
| <b>Allgemeine Hinweise</b>                              | Antwortformat verbessern                         | 3                       |
|                                                         | Definition „Einschränkungen“ gewünscht           | 4                       |
|                                                         | Gliederung positiv bewertet                      | 1                       |
|                                                         | Hintergrundinformationen gewünscht               | 1                       |
|                                                         | Periodenprävalenz unklar                         | 2                       |
|                                                         | Titel verbessern                                 | 1                       |
|                                                         | Beruf und Freizeit trennen                       | 2                       |
|                                                         | Verständlichkeit positiv bewertet                | 2                       |
|                                                         | Formulierungen als zu allgemein gewertet         | 3                       |
|                                                         | <b>Gesamt</b>                                    | <b>19</b>               |
| <b>Hinweise zu soziodemografischen Aspekten</b>         | Führungsfunktion miterfassen                     | 1                       |
|                                                         | Master/Diplom/Promotion differenzierter erfassen | 3                       |
|                                                         | Mehrfachauswahl ermöglichen                      | 1                       |
|                                                         | Nebentätigkeiten erfassen                        | 2                       |
|                                                         | Berufliche Stellung verständlicher erfassen      | 12                      |
|                                                         | <b>Gesamt</b>                                    | <b>19</b>               |
| <b>Fehlende bzw. mit zu betrachtende Körperregionen</b> | Brustwirbelsäule                                 | 1                       |
|                                                         | Fingergelenke                                    | 2                       |
|                                                         | Kiefer                                           | 2                       |
|                                                         | Kopf                                             | 2                       |
|                                                         | Rumpf(-muskulatur)                               | 2                       |
|                                                         | Sehen (Augen)                                    | 1                       |
|                                                         | Sehnen                                           | 1                       |
|                                                         | Steißbein/Sitzhöcker                             | 1                       |
|                                                         | Stimmbänder                                      | 1                       |
|                                                         | Ausstrahlende Beschwerden                        | 3                       |
|                                                         | Verspannungen im Schulterbereich                 | 1                       |
|                                                         | <b>Gesamt</b>                                    | <b>17</b>               |
|                                                         | <b>Hinweise zur Darstellung</b>                  | Formatierung optimieren |
| Geschlechtsneutral abbilden                             |                                                  | 1                       |
| Körperregionen differenzierter darstellen und abfragen  |                                                  | 3                       |
| <b>Gesamt</b>                                           |                                                  | <b>7</b>                |
| <b>Ausfüllhinweis</b>                                   | Datumsangabe präziser vorgeben                   | 1                       |
|                                                         | Fortsetzung auf Doppelseite markieren            | 1                       |
|                                                         | Fehlerhafte Angaben korrigieren                  | 1                       |
|                                                         | <b>Gesamt</b>                                    | <b>3</b>                |
